# Supplementary material for: Overexpression of SIRT6 in the hippocampal CA1 impairs the formation of long-term contextual fear memory
Source: PubMed Central journal article supplement (PMC4702175; doi:10.1038/srep18982), 2016-01-06
Supplement: srep18982-s1.pdf [file srep18982-s1.pdf]

# Overexpression of SIRT6 in the hippocampal CA1 impairs the formation of long-term contextual fear memory

Xi Yin<sup>1#</sup>, Yuan Gao<sup>2#</sup>, Hai-Shui Shi<sup>2\*</sup>, Li Song<sup>2</sup>, Jie-Chao Wang<sup>3</sup>, Juan Shao<sup>4</sup>, Xu-Hong Geng<sup>1</sup>, Gai Xue<sup>5</sup>, Jian-Li Li<sup>5</sup>, Yan-Ning Hou<sup>5</sup>

<sup>1</sup> Department of Functional region of Diagnosis, Hebei Medical University Fourth Hospital, Hebei Medical University, Shijiazhuang 050011, China;

<sup>2</sup>Department of Biochemistry and Molecular Biology, College of basic medicine, Hebei Medical University, Shijiazhuang 050017, China;

<sup>3</sup>Department of vasculocardiology, Hebei Province Geriatric Hospital, Shijiazhuang, 050011, China;

<sup>4</sup>Department of Senile Disease, the Third Hospital of Hebei Medical University, Shijiazhuang 050000, China;

<sup>5</sup>Department of Pharmacy, the Bethune International Peace Hospital of PLA, Shijiazhuang 050082, China;

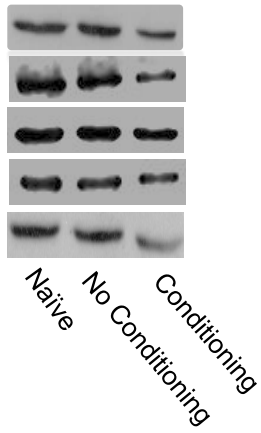

**Fig. S1.** Western blot results of SIRT6 expression in the CA1 region of rats 1h after fear conditioning.

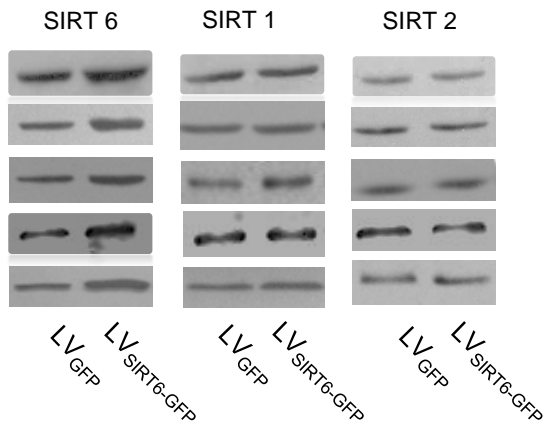

**Fig. S2.** Western blot results of several isoforms of SIRTs in the CA1 after LV<sub>SIRT6-GFP</sub> or LV<sub>GFP</sub> infusion.

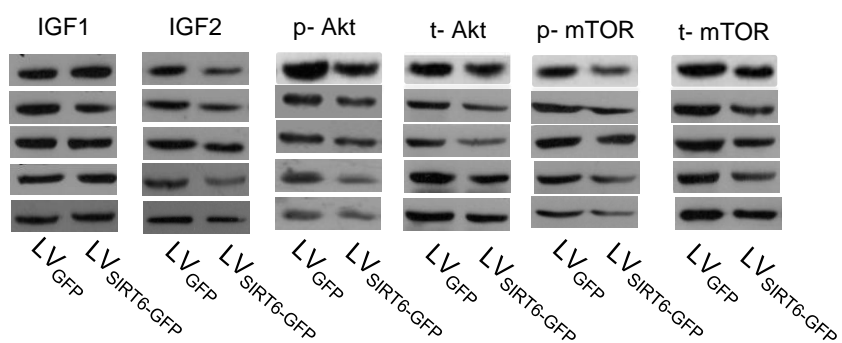

**Fig.S3.** Western blot results of expression and phosphorylation of IGF signaling-related proteins after SIRT6 overexpression in the CA1 of hippocampus.
